# Supplementary material for: New Polymeric Adsorbents Functionalized with Aminobenzoic Groups for the Removal of Residual Antibiotics
Source: MDPI journal article supplement (doi:10.3390/molecules27092894), 2022-04-30
Supplement: s1 [file s1]

# New Polymeric Adsorbents Functionalized with Aminobenzoic Groups for Removal of Residual Antibiotics

Radu Ardelean<sup>1</sup>, Adriana Popa<sup>2</sup>, Ecaterina Stela Drăgan<sup>3\*</sup>, Corneliu-Mircea Davidescu<sup>1,4\*</sup> and Maria Ignat<sup>5</sup>

**Table S1.** Kinetic parameters of pseudo-first order (PFO) and pseudo-second order (PSO) for the adsorption of sulfamethoxazole and tetracycline on PAB 1, PAB 2 and PAB 3 polymeric adsorbents.

**Table S2.** Experimental equilibrium adsorption data.

**Table S3.** Parameters of Langmuir, Freundlich, Sips and Redlich-Peterson adsorption isotherms in the adsorption of Sulfamethoxazole.

**Table S4.** Separation factors  $R_L$  for sulfamethoxazole adsorption onto PAB1, PAB2 and PAB3 adsorbents.

**Table S5.** Parameters of Langmuir, Freundlich, Sips and Redlich-Peterson adsorption isotherms in the adsorption of Tetracycline.

**Figure S1.** Chemical structures of the adsorbates.

**Table S1.** Kinetic parameters of pseudo-first order (PFO) and pseudo-second order (PSO) for the adsorption of sulfamethoxazole and tetracycline on PAB 1, PAB 2 and PAB 3 polymeric adsorbents.

| Polymeric adsorbent | Adsorbate        | Temperature, [K] | PFO                        |        | PSO                                          |        |
|---------------------|------------------|------------------|----------------------------|--------|----------------------------------------------|--------|
|                     |                  |                  | $k_1$ , [h <sup>-1</sup> ] | $R^2$  | $k_2$ [L.h <sup>-1</sup> .mM <sup>-1</sup> ] | $R^2$  |
| PAB 1               | sulfamethoxazole | 298              | 0.434                      | 0.9572 | 3.803                                        | 0.9920 |
|                     |                  | 308              | 0.484                      | 0.9729 | 6.067                                        | 0.9961 |
|                     |                  | 313              | 0.493                      | 0.9614 | 8.792                                        | 0.9978 |
|                     |                  | 318              | 0.478                      | 0.9824 | 11.444                                       | 0.9990 |
|                     | tetracycline     | 298              | 0.529                      | 0.9875 | 4.440                                        | 0.9968 |
|                     |                  | 308              | 0.545                      | 0.9876 | 6.002                                        | 0.9984 |
|                     |                  | 313              | 0.551                      | 0.9874 | 8.052                                        | 0.9991 |
|                     |                  | 318              | 0.593                      | 0.9774 | 10.992                                       | 0.9996 |
| PAB 2               | sulfamethoxazole | 298              | 0.436                      | 0.9842 | 4.935                                        | 0.9971 |
|                     |                  | 308              | 0.519                      | 0.9809 | 6.384                                        | 0.9977 |
|                     |                  | 313              | 0.516                      | 0.9841 | 9.202                                        | 0.9989 |
|                     |                  | 318              | 0.471                      | 0.9697 | 11.216                                       | 0.9994 |
|                     | tetracycline     | 298              | 0.524                      | 0.9854 | 3.716                                        | 0.9963 |
|                     |                  | 308              | 0.549                      | 0.9802 | 4.968                                        | 0.9979 |
|                     |                  | 313              | 0.525                      | 0.9865 | 6.523                                        | 0.9989 |
|                     |                  | 318              | 0.560                      | 0.9788 | 8.078                                        | 0.9991 |
| PAB 3               | sulfamethoxazole | 298              | 0.481                      | 0.9709 | 5.459                                        | 0.9979 |
|                     |                  | 308              | 0.520                      | 0.9762 | 6.328                                        | 0.9986 |
|                     |                  | 313              | 0.544                      | 0.9851 | 9.368                                        | 0.9991 |
|                     |                  | 318              | 0.572                      | 0.9701 | 11.064                                       | 0.9994 |
|                     | tetracycline     | 298              | 0.543                      | 0.9866 | 3.701                                        | 0.9975 |
|                     |                  | 308              | 0.557                      | 0.9801 | 4.808                                        | 0.9984 |
|                     |                  | 313              | 0.586                      | 0.9815 | 5.853                                        | 0.9988 |
|                     |                  | 318              | 0.630                      | 0.9862 | 7.713                                        | 0.9991 |

**Table S2.** Experimental equilibrium adsorption data.

| Adsorbent                | Adsorbate                |                          |                          | Temperature              |                          |                          |                          |                          |                          |
|--------------------------|--------------------------|--------------------------|--------------------------|--------------------------|--------------------------|--------------------------|--------------------------|--------------------------|--------------------------|
|                          | Sulfa-<br>methoxazole    | 298 [K]                  |                          | 308 [K]                  |                          | 313 [K]                  |                          | 318 [K]                  |                          |
|                          | C <sub>i</sub><br>[mM/L] | C <sub>e</sub><br>[mM/L] | q <sub>e</sub><br>[mM/g] |
| PAB1                     | 3.000                    | 1.988                    | 0.127                    | 2.017                    | 0.123                    | 2.038                    | 0.120                    | 2.058                    | 0.118                    |
|                          | 2.500                    | 1.633                    | 0.108                    | 1.659                    | 0.105                    | 1.679                    | 0.103                    | 1.697                    | 0.100                    |
|                          | 2.000                    | 1.287                    | 0.089                    | 1.309                    | 0.086                    | 1.326                    | 0.084                    | 1.342                    | 0.082                    |
|                          | 1.000                    | 0.622                    | 0.047                    | 0.635                    | 0.046                    | 0.645                    | 0.044                    | 0.655                    | 0.043                    |
|                          | Tetracycline             | 298 [K]                  |                          | 308 [K]                  |                          | 313 [K]                  |                          | 318 [K]                  |                          |
|                          | 3.000                    | 1.301                    | 0.212                    | 1.327                    | 0.209                    | 1.344                    | 0.207                    | 1.357                    | 0.205                    |
|                          | 2.500                    | 1.033                    | 0.183                    | 1.057                    | 0.180                    | 1.075                    | 0.178                    | 1.089                    | 0.176                    |
|                          | 2.000                    | 0.782                    | 0.152                    | 0.805                    | 0.149                    | 0.821                    | 0.147                    | 0.835                    | 0.146                    |
|                          | 1.000                    | 0.341                    | 0.082                    | 0.356                    | 0.081                    | 0.368                    | 0.079                    | 0.377                    | 0.078                    |
| PAB2                     | Sulfa-<br>methoxazole    | 298 [K]                  |                          | 308 [K]                  |                          | 313 [K]                  |                          | 318 [K]                  |                          |
|                          | C <sub>i</sub><br>[mM/L] | C <sub>e</sub><br>[mM/L] | q <sub>e</sub><br>[mM/g] |
|                          | 3.000                    | 1.704                    | 0.162                    | 1.727                    | 0.159                    | 1.746                    | 0.157                    | 1.766                    | 0.154                    |
|                          | 2.500                    | 1.388                    | 0.139                    | 1.409                    | 0.136                    | 1.427                    | 0.134                    | 1.446                    | 0.132                    |
|                          | 2.000                    | 1.083                    | 0.115                    | 1.102                    | 0.112                    | 1.118                    | 0.110                    | 1.135                    | 0.108                    |
|                          | 1.000                    | 0.511                    | 0.061                    | 0.523                    | 0.060                    | 0.533                    | 0.058                    | 0.544                    | 0.057                    |
|                          | Tetracycline             | 298 [K]                  |                          | 308 [K]                  |                          | 313 [K]                  |                          | 318 [K]                  |                          |
|                          | 3.000                    | 1.128                    | 0.234                    | 1.151                    | 0.231                    | 1.170                    | 0.229                    | 1.197                    | 0.225                    |
|                          | 2.500                    | 0.877                    | 0.203                    | 0.900                    | 0.200                    | 0.919                    | 0.198                    | 0.946                    | 0.194                    |
|                          | 2.000                    | 0.647                    | 0.169                    | 0.669                    | 0.166                    | 0.688                    | 0.164                    | 0.713                    | 0.161                    |
|                          | 1.000                    | 0.261                    | 0.092                    | 0.277                    | 0.090                    | 0.290                    | 0.089                    | 0.308                    | 0.087                    |
|                          | PAB3                     | Sulfa-<br>methoxazole    | 298 [K]                  |                          | 308 [K]                  |                          | 313 [K]                  |                          | 318 [K]                  |
| C <sub>i</sub><br>[mM/L] |                          | C <sub>e</sub><br>[mM/L] | q <sub>e</sub><br>[mM/g] |
| 3.000                    |                          | 1.457                    | 0.193                    | 1.480                    | 0.190                    | 1.492                    | 0.189                    | 1.519                    | 0.185                    |
| 2.500                    |                          | 1.175                    | 0.166                    | 1.197                    | 0.163                    | 1.210                    | 0.161                    | 1.234                    | 0.158                    |
| 2.000                    |                          | 0.907                    | 0.137                    | 0.927                    | 0.134                    | 0.939                    | 0.133                    | 0.961                    | 0.130                    |
| 1.000                    |                          | 0.417                    | 0.073                    | 0.430                    | 0.071                    | 0.438                    | 0.070                    | 0.452                    | 0.069                    |
| Tetracycline             |                          | 298 [K]                  |                          | 308 [K]                  |                          | 313 [K]                  |                          | 318 [K]                  |                          |
| 3.000                    |                          | 0.697                    | 0.288                    | 0.728                    | 0.284                    | 0.748                    | 0.282                    | 0.761                    | 0.280                    |
| 2.500                    |                          | 0.528                    | 0.247                    | 0.559                    | 0.243                    | 0.579                    | 0.240                    | 0.596                    | 0.238                    |
| 2.000                    |                          | 0.377                    | 0.203                    | 0.406                    | 0.199                    | 0.427                    | 0.197                    | 0.444                    | 0.195                    |
| 1.000                    |                          | 0.140                    | 0.108                    | 0.16                     | 0.105                    | 0.175                    | 0.103                    | 0.187                    | 0.102                    |

**Table S3.** Parameters of Langmuir, Freundlich, Sips and Redlich-Peterson adsorption isotherms in the adsorption of Sulfamethoxazole.

| Adsorption isotherm | Parameter                                                          | Temperature [K] | Adsorbent   |             |             |
|---------------------|--------------------------------------------------------------------|-----------------|-------------|-------------|-------------|
|                     |                                                                    |                 | PAB1        | PAB2        | PAB3        |
| Langmuir            | $K_L$<br>[L/mM]                                                    | 298             | 0.143±0.006 | 0.239±0.004 | 0.347±0.008 |
|                     |                                                                    | 308             | 0.141±0.007 | 0.220±0.010 | 0.302±0.007 |
|                     |                                                                    | 313             | 0.123±0.005 | 0.187±0.004 | 0.274±0.011 |
|                     |                                                                    | 318             | 0.109±0.005 | 0.178±0.003 | 0.259±0.009 |
|                     | $q_{max}$<br>[mM/g]                                                | 298             | 0.571±0.019 | 0.556±0.007 | 0.573±0.010 |
|                     |                                                                    | 308             | 0.553±0.024 | 0.575±0.019 | 0.614±0.010 |
|                     |                                                                    | 313             | 0.598±0.019 | 0.638±0.012 | 0.648±0.020 |
|                     |                                                                    | 318             | 0.645±0.025 | 0.643±0.010 | 0.654±0.017 |
|                     | $R^2$                                                              | 298             | 0.99996     | 0.99999     | 0.99997     |
|                     |                                                                    | 308             | 0.99994     | 0.99994     | 0.99998     |
|                     |                                                                    | 313             | 0.99997     | 0.99999     | 0.99994     |
|                     |                                                                    | 318             | 0.99997     | 0.99999     | 0.99996     |
| Freundlich          | $K_F$<br>[mM <sup>(1-1/n)</sup> L <sup>1/n</sup> g <sup>-1</sup> ] | 298             | 0.071±0.001 | 0.106±0.001 | 0.146±0.001 |
|                     |                                                                    | 308             | 0.068±0.001 | 0.103±0.001 | 0.141±0.001 |
|                     |                                                                    | 313             | 0.065±0.001 | 0.099±0.001 | 0.138±0.001 |
|                     |                                                                    | 318             | 0.063±0.001 | 0.096±0.001 | 0.133±0.001 |
|                     | $1/n$                                                              | 298             | 0.847±0.012 | 0.799±0.018 | 0.766±0.018 |
|                     |                                                                    | 308             | 0.846±0.008 | 0.808±0.012 | 0.785±0.017 |
|                     |                                                                    | 313             | 0.863±0.016 | 0.830±0.014 | 0.799±0.016 |
|                     |                                                                    | 318             | 0.875±0.009 | 0.835±0.015 | 0.804±0.014 |
|                     | $R^2$                                                              | 298             | 0.99984     | 0.99958     | 0.99951     |
|                     |                                                                    | 308             | 0.99991     | 0.99981     | 0.99959     |
|                     |                                                                    | 313             | 0.99968     | 0.99977     | 0.99965     |
|                     |                                                                    | 318             | 0.99990     | 0.99971     | 0.99973     |
| Sips                | $K_s$<br>[L/mM]                                                    | 298             | 0.106±0.024 | 0.216±0.018 | 0.280±0.001 |
|                     |                                                                    | 308             | 0.081±0.009 | 0.142±0.003 | 0.247±0.007 |
|                     |                                                                    | 313             | 0.143±0.025 | 0.151±0.005 | 0.212±0.047 |
|                     |                                                                    | 318             | 0.077±0.019 | 0.165±0.019 | 0.189±0.009 |
|                     | $q_m$<br>[mM/g]                                                    | 298             | 0.745±0.149 | 0.606±0.041 | 0.674±0.003 |
|                     |                                                                    | 308             | 0.914±0.094 | 0.834±0.017 | 0.718±0.016 |
|                     |                                                                    | 313             | 0.526±0.079 | 0.761±0.021 | 0.797±0.014 |
|                     |                                                                    | 318             | 0.888±0.208 | 0.687±0.066 | 0.842±0.038 |
|                     | $n$                                                                | 298             | 0.969±0.026 | 0.980±0.015 | 0.955±0.001 |
|                     |                                                                    | 308             | 0.932±0.009 | 0.930±0.003 | 0.961±0.005 |
|                     |                                                                    | 313             | 1.022±0.029 | 0.967±0.004 | 0.954±0.033 |
|                     |                                                                    | 318             | 0.961±0.022 | 0.987±0.017 | 0.947±0.007 |
|                     | $R^2$                                                              | 298             | 0.99998     | 0.99999     | 1.00000     |
|                     |                                                                    | 308             | 1.00000     | 1.00000     | 1.00000     |
|                     |                                                                    | 313             | 0.99997     | 1.00000     | 0.99996     |
|                     |                                                                    | 318             | 0.99998     | 0.99999     | 1.00000     |

Table S3. Cont.

| Adsorption isotherm | Parameter                     | Temperature [K] | Adsorbent   |             |             |
|---------------------|-------------------------------|-----------------|-------------|-------------|-------------|
|                     |                               |                 | PAB1        | PAB2        | PAB3        |
| Redlich-Peterson    | $K_{RP}$<br>[L/mM]            | 298             | 0.087±0.004 | 0.137±0.002 | 0.211±0.001 |
|                     |                               | 308             | 0.088±0.003 | 0.141±0.001 | 0.195±0.002 |
|                     |                               | 313             | 0.072±0.002 | 0.124±0.001 | 0.189±0.010 |
|                     |                               | 318             | 0.074±0.003 | 0.116±0.003 | 0.182±0.002 |
|                     | $a$<br>[(L/mM) <sup>b</sup> ] | 298             | 0.215±0.056 | 0.271±0.025 | 0.429±0.006 |
|                     |                               | 308             | 0.288±0.043 | 0.365±0.003 | 0.369±0.013 |
|                     |                               | 313             | 0.096±0.024 | 0.241±0.007 | 0.361±0.075 |
|                     |                               | 318             | 0.175±0.053 | 0.194±0.027 | 0.359±0.015 |
|                     | $b$                           | 298             | 0.760±0.134 | 0.913±0.058 | 0.850±0.008 |
|                     |                               | 308             | 0.620±0.062 | 0.700±0.004 | 0.855±0.023 |
|                     |                               | 313             | 0.995±0.186 | 0.832±0.017 | 0.807±0.125 |
|                     |                               | 318             | 0.721±0.151 | 0.939±0.093 | 0.777±0.023 |
|                     | $R^2$                         | 298             | 0.99998     | 0.99999     | 1.00000     |
|                     |                               | 308             | 1.00000     | 1.00000     | 1.00000     |
|                     |                               | 313             | 0.99997     | 1.00000     | 0.99998     |
|                     |                               | 318             | 0.99998     | 0.99999     | 1.00000     |

**Table S4.** Separation factors  $R_L$  for sulfamethoxazole adsorption onto PAB1, PAB2 and PAB3 adsorbents.

| Temperature<br>[K] | $C_o$<br>[mM.L <sup>-1</sup> ] | $R_L$<br>PAB1 | $R_L$<br>PAB2 | $R_L$<br>PAB3 |
|--------------------|--------------------------------|---------------|---------------|---------------|
| 298                | 3.000                          | 0.700         | 0.582         | 0.490         |
|                    | 2.500                          | 0.737         | 0.626         | 0.535         |
|                    | 2.000                          | 0.778         | 0.677         | 0.590         |
|                    | 1.000                          | 0.875         | 0.807         | 0.742         |
| 308                | 3.000                          | 0.703         | 0.602         | 0.525         |
|                    | 2.500                          | 0.739         | 0.645         | 0.570         |
|                    | 2.000                          | 0.780         | 0.694         | 0.623         |
|                    | 1.000                          | 0.876         | 0.820         | 0.768         |
| 313                | 3.000                          | 0.730         | 0.641         | 0.549         |
|                    | 2.500                          | 0.765         | 0.681         | 0.593         |
|                    | 2.000                          | 0.803         | 0.728         | 0.646         |
|                    | 1.000                          | 0.890         | 0.842         | 0.785         |
| 318                | 3.000                          | 0.754         | 0.652         | 0.563         |
|                    | 2.500                          | 0.786         | 0.692         | 0.607         |
|                    | 2.000                          | 0.821         | 0.737         | 0.659         |
|                    | 1.000                          | 0.902         | 0.849         | 0.794         |

**Table S5.** Parameters of Langmuir, Freundlich, Sips and Redlich-Peterson adsorption isotherms in the adsorption of Tetracycline.

| Adsorption isotherm | Parameter                                                          | Temperature, [ K] | Adsorbent   |             |             |
|---------------------|--------------------------------------------------------------------|-------------------|-------------|-------------|-------------|
|                     |                                                                    |                   | PAB1        | PAB2        | PAB3        |
| Langmuir            | $K_L$<br>[L/mM]                                                    | 298               | 0.574±0.028 | 0.965±0.072 | 1.821±0.199 |
|                     |                                                                    | 308               | 0.519±0.032 | 0.835±0.056 | 1.380±0.118 |
|                     |                                                                    | 313               | 0.455±0.021 | 0.751±0.050 | 1.115±0.078 |
|                     |                                                                    | 318               | 0.427±0.017 | 0.656±0.036 | 0.940±0.066 |
|                     | $q_{max}$<br>[mM/g]                                                | 298               | 0.493±0.015 | 0.445±0.018 | 0.509±0.029 |
|                     |                                                                    | 308               | 0.510±0.021 | 0.468±0.018 | 0.562±0.028 |
|                     |                                                                    | 313               | 0.543±0.017 | 0.486±0.019 | 0.616±0.026 |
|                     |                                                                    | 318               | 0.556±0.016 | 0.509±0.018 | 0.687±0.030 |
|                     | $R^2$                                                              | 298               | 0.99983     | 0.99983     | 0.99961     |
|                     |                                                                    | 308               | 0.99975     | 0.99959     | 0.99929     |
|                     |                                                                    | 313               | 0.99987     | 0.99963     | 0.99961     |
|                     |                                                                    | 318               | 0.99991     | 0.99977     | 0.99966     |
| Freundlich          | $K_F$<br>[mM <sup>(1-1/n)</sup> L <sup>1/n</sup> g <sup>-1</sup> ] | 298               | 0.178±0.001 | 0.219±0.002 | 0.361±0.004 |
|                     |                                                                    | 308               | 0.172±0.001 | 0.213±0.002 | 0.351±0.004 |
|                     |                                                                    | 313               | 0.168±0.001 | 0.208±0.002 | 0.346±0.004 |
|                     |                                                                    | 318               | 0.164±0.001 | 0.200±0.001 | 0.342±0.003 |
|                     | $1/n$                                                              | 298               | 0.698±0.018 | 0.628±0.017 | 0.602±0.014 |
|                     |                                                                    | 308               | 0.712±0.015 | 0.651±0.017 | 0.646±0.016 |
|                     |                                                                    | 313               | 0.734±0.016 | 0.668±0.017 | 0.681±0.017 |
|                     |                                                                    | 318               | 0.743±0.018 | 0.689±0.018 | 0.708±0.015 |
|                     | $R^2$                                                              | 298               | 0.99942     | 0.99935     | 0.99952     |
|                     |                                                                    | 308               | 0.99963     | 0.99937     | 0.99945     |
|                     |                                                                    | 313               | 0.99957     | 0.99946     | 0.99941     |
|                     |                                                                    | 318               | 0.99952     | 0.99944     | 0.99957     |
| Sips                | $K_S$<br>[L/mM]                                                    | 298               | 0.359±0.016 | 0.449±0.004 | 0.513±0.005 |
|                     |                                                                    | 308               | 0.275±0.007 | 0.428±0.007 | 0.539±0.004 |
|                     |                                                                    | 313               | 0.289±0.003 | 0.383±0.020 | 0.541±0.052 |
|                     |                                                                    | 318               | 0.299±0.035 | 0.381±0.015 | 0.543±0.053 |
|                     | $q_m$<br>[mM/g]                                                    | 298               | 0.678±0.021 | 0.706±0.001 | 1.023±0.008 |
|                     |                                                                    | 308               | 0.803±0.015 | 0.710±0.008 | 0.965±0.005 |
|                     |                                                                    | 313               | 0.754±0.006 | 0.752±0.028 | 0.949±0.062 |
|                     |                                                                    | 318               | 0.720±0.064 | 0.729±0.021 | 1.07±0.093  |
|                     | $n$                                                                | 298               | 0.892±0.008 | 0.817±0.001 | 0.747±0.001 |
|                     |                                                                    | 308               | 0.869±0.004 | 0.843±0.003 | 0.811±0.001 |
|                     |                                                                    | 313               | 0.906±0.002 | 0.848±0.009 | 0.856±0.015 |
|                     |                                                                    | 318               | 0.925±0.021 | 0.877±0.007 | 0.862±0.016 |
|                     | $R^2$                                                              | 298               | 1.00000     | 1.00000     | 1.00000     |
|                     |                                                                    | 308               | 1.00000     | 1.00000     | 1.00000     |
|                     |                                                                    | 313               | 1.00000     | 1.00000     | 0.99999     |
|                     |                                                                    | 318               | 0.99998     | 1.00000     | 0.99999     |

Table S5. Cont.

| Adsorption isotherm | Parameter                     | Temperature, [ K] | Adsorbent   |             |             |
|---------------------|-------------------------------|-------------------|-------------|-------------|-------------|
|                     |                               |                   | PAB1        | PAB2        | PAB3        |
| Redlich-Peterson    | $K_{RP}$<br>[L/mM]            | 298               | 0.332±0.003 | 0.588±0.008 | 1.590±0.027 |
|                     |                               | 308               | 0.331±0.006 | 0.506±0.009 | 1.106±0.014 |
|                     |                               | 313               | 0.285±0.001 | 0.471±0.016 | 0.878±0.024 |
|                     |                               | 318               | 0.264±0.009 | 0.403±0.003 | 0.801±0.029 |
|                     | $a$<br>[(L/mM) <sup>b</sup> ] | 298               | 0.856±0.019 | 1.689±0.038 | 3.558±0.074 |
|                     |                               | 308               | 0.909±0.037 | 1.378±0.044 | 2.256±0.038 |
|                     |                               | 313               | 0.684±0.004 | 1.262±0.078 | 1.622±0.059 |
|                     |                               | 318               | 0.594±0.055 | 1.007±0.016 | 1.410±0.084 |
|                     | $b$                           | 298               | 0.747±0.011 | 0.690±0.008 | 0.614±0.006 |
|                     |                               | 308               | 0.672±0.016 | 0.704±0.013 | 0.648±0.007 |
|                     |                               | 313               | 0.738±0.003 | 0.691±0.025 | 0.685±0.022 |
|                     |                               | 318               | 0.777±0.052 | 0.725±0.075 | 0.658±0.030 |
|                     | $R^2$                         | 298               | 1.00000     | 1.00000     | 1.00000     |
|                     |                               | 308               | 1.00000     | 1.00000     | 1.00000     |
|                     |                               | 313               | 1.00000     | 0.99999     | 0.99999     |
|                     |                               | 318               | 0.99999     | 0.99999     | 0.99999     |

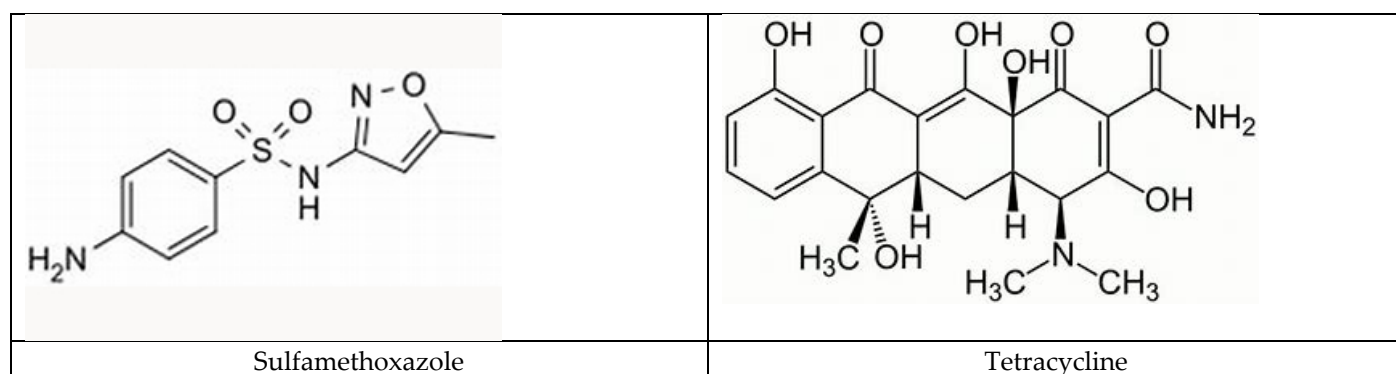

Figure S1. Chemical structures of the adsorbates.
